1 **Title**

2

3 High-throughput 3D tracking reveals the importance of near wall swimming and initial  
4 attachment behaviors of *P. aeruginosa* for biofilm formation on a vertical wall

5

6 **Running Title**

7

8 Near wall behavior of *PAO1* regulates biofilm formation

9

10 **Author affiliation**

11

12 Nicole Zi-Jia Khong<sup>1,\*</sup>, Yukai Zeng<sup>2,\*</sup>, Soak-Kuan Lai<sup>1,\*</sup>, Cheng-Gee Koh<sup>1</sup>, Zhao-Xun  
13 Liang<sup>1</sup>, Keng-Hwee Chiam<sup>2,#</sup>, Hoi-Yeung Li<sup>1,#</sup>

14

15 <sup>1</sup> *School of Biological Sciences, College of Science, Nanyang Technological University,*  
16 *Singapore*

17 <sup>2</sup> *Bioinformatics Institute, A\*STAR, Singapore*

18

19 \* *These authors contributed equally:*

20 *Co-first author (1<sup>st</sup>): Nicole Zi-Jia Khong co-designed and performed all the*  
21 *experiments. She wrote the first draft of the manuscript.*

22 *Co-first author (2<sup>nd</sup>): Yukai Zhen performed all the data analysis and*  
23 *mathematical modeling and produced all figures.*

24 # *Corresponding author:*

25 *for light sheet imaging and experimental design - [hyli@ntu.edu.sg](mailto:hyli@ntu.edu.sg),*

26 *for image and data analysis - [chiamkh@bii.a-star.edu.sg](mailto:chiamkh@bii.a-star.edu.sg)*

27

28

29

## 30 **Abstract**

31

32 Studying the swimming behaviour of bacteria in 3 dimensions (3D) allows us to  
33 understand critical biological processes, such as biofilm formation. It is still unclear how  
34 near wall swimming behaviour may regulate the initial attachment and biofilm formation.  
35 It is challenging to address this as visualizing the movement of bacteria with reasonable  
36 spatial and temporal resolution in a high-throughput manner is technically difficult. Here,  
37 we compared the near wall (vertical) swimming behaviour of *P. aeruginosa* (PAO1) and  
38 its mutants  $\Delta dipA$  (reduced in swarming motility and increased in biofilm formation) and  
39  $\Delta fimX$  (deficient in twitching motility and reduced in biofilm formation) using our new  
40 imaging technique based on light sheet microscopy. We found that *P. aeruginosa*  
41 (PAO1) increases its speed and changes its swimming angle drastically when it gets  
42 closer to a wall. In contrast,  $\Delta dipA$  mutant moves toward the wall with steady speed  
43 without changing of swimming angle. The near wall behavior of  $\Delta dipA$  allows it to be  
44 more effective to interact with the wall or wall-attached cells, thus leading to more  
45 capture events and a larger biofilm volume during initial attachment when compared  
46 with PAO1. Furthermore, we found that  $\Delta fimX$  has a similar near wall swimming  
47 behavior as PAO1, however, it has a higher dispersal frequency and smaller biofilm  
48 formation when compared with PAO1 which can be explained by its poor twitching  
49 motility. Together, we propose that near wall swimming behavior of *P. aeruginosa* plays  
50 an important role in the regulation of initial attachment and biofilm formation.

51

52

## 53 **Importance**

54

55 Bacterial biofilm is a community of bacteria on surfaces which leads to serious problems  
56 in medical devices, food industry, and aquaculture. The initial attachment and  
57 subsequent microcolony formation play critical roles in bacterial biofilm formation.  
58 However, it is unclear how the initial attachment is regulated, in particular, on a vertical  
59 surface. To study this, we have developed a novel imaging technique based on light  
60 sheet microscopy, which overcame the limitations of other imaging techniques, to  
61 understand how 3D bacterial motility near a wall may regulate initial attachment during  
62 biofilm formation. Using our technique, we discovered that near wall swimming behavior  
63 of the bacteria, *P. aeruginosa*, plays an important role in the regulation of biofilm  
64 formation during initial attachment.

65

66

67

68

## 69 **Introduction**

70

71 In the early stages of biofilm formation, planktonic bacteria swim close to the surface by  
72 rotating their flagella and attach to the surface using their pili. However, little is known  
73 about the dynamics of these processes (1). Several *P. aeruginosa* mutants have earlier  
74 been identified to be important in motility and biofilm formation (2). The mutant  $\Delta dipA$  is  
75 found to have diminished swimming motility but enhanced initial attachment and  
76 reduced dispersal during early biofilm formation. *P. aeruginosa* lacking in DipA ( $\Delta dipA$ )  
77 has significantly higher c-di-GMP levels, resulting in more efficient biofilm formation (3).  
78 In addition to flagella-mediated motility, *P. aeruginosa* is able to propagate at surfaces  
79 by type IV pili-mediated twitching motility. The type IV pili-mediated twitching motility  
80 contributes to the initial tethering and attachment during biofilm formation (4, 5). Mutant  
81 PAO1 lacking in the c-di-GMP binding protein, FimX, required for T4P assembly biofilm  
82 formation is less capable of microcolony and biofilm formation due to deficiency in  
83 twitching motility (6). Therefore, to fully understand the complex nature of biofilm  
84 formation, it is necessary to look into how each component of bacteria motility patterns  
85 contributes to the entire process of biofilm development.

86

87 Numerous motility strategies have been developed by bacteria to allow them to  
88 transverse complex natural environments and to facilitate cell-cell interactions (7, 8). By  
89 studying how bacteria move and analyzing their trajectories, we can extract valuable  
90 information on various microbial processes, such as behavioral responses towards  
91 chemical stimuli, signaling pathway mechanisms, as well as the behavioral signatures of  
92 different bacterial species during initial attachment of biofilm formation. However, it is  
93 extremely challenging to visualize and track bacterial movement and trajectories due to  
94 its small size and its variable dynamics, which can span a broad range from  
95 milliseconds to minutes (9). The standard approach to examine bacterial motility is to  
96 carry out two-dimensional (2D) imaging using optical microscopy (10, 11) or perform  
97 swarming assays on agar plates (12). Nevertheless, as most microbial systems are  
98 intrinsically three-dimensional (3D) in their organization, 2D approaches may lead to  
99 misinterpretation of behavioral patterns.

100

101 Several techniques have been developed to track 3D motility behavior of bacteria. One  
102 of the earliest techniques was based on the automatic motion of the scanning stage to  
103 keep an individual bacterium in focus (13). This technique is limited to observing one  
104 cell at a time but provided key understanding of the motility behavior of *Escherichia coli*.  
105 More recent and powerful optical techniques that have been used include intensity  
106 correlation microscopy, defocused microscopy (14), stereoscopic microscopy (15) and  
107 digital holographic microscopy (15-17). Digital holographic microscopy, in particular, is a  
108 preferred method to perform 3D tracking of bacteria because it is able to capture a large  
109 depth of field and therefore providing high throughput data. However, it is often limited

110 by the lack of contrast of the samples (especially when using unlabeled cells) and  
111 secondary scattering of the bacteria, which produce poor holograms due to overlapping  
112 signals when there are too many bacteria cells (16). These make resolving and tracking  
113 of individual cell difficult and more errors are generated when the concentration of the  
114 sample is high. Although these techniques aim to image 3D motility of bacteria, they are  
115 not able to analyze biofilm formation on vertical surfaces.

116

117 Here, we introduce a novel imaging technique that is sensitive, minimally toxic and can  
118 rapidly capture large fields of view for 3D measurement of individual motile bacterium  
119 using the light sheet microscopy. The 3D trajectories obtained do not suffer from the  
120 errors mentioned above. Furthermore, our imaging technique allows proper visualization  
121 of bacteria behavior near a vertical wall. Biofilms commonly form on various solid  
122 surfaces, including vertical and tilted walls, ceilings and pipes (18). To our knowledge,  
123 many studies focused on biofilms formed on air-water interface or on a horizontal  
124 surface (19). The imaging technique described in this paper takes into consideration  
125 bacteria motility near and away from a vertical wall, representative of naturally occurring  
126 biofilms. By using fluorescence-labeled cells, we can directly visualize and track multiple  
127 individual cell trajectories and obtain information about swimming speeds and turns.  
128 The design of our technique also allows us to capture swimming patterns of bacteria in  
129 bulk fluid and near wall surfaces. This robust method provides the means to study the  
130 dynamics of bacterial motility and also allows us to examine the structural architecture  
131 and microbial processes of microbial communities on a wall. By comparing the free  
132 swimming, near wall dynamic behaviors and initial attachment on a wall of *P.*  
133 *aeruginosa* (PAO1) and PAO mutants  $\Delta dipA$  and  $\Delta fimX$ , we are able to understand the  
134 correlation between near wall behavior and initial attachment in the regulation of biofilm  
135 formation.

136

## 137 **Results**

138

### 139 3-Dimensional light sheet microscopy system setup and design for tracking of multiple 140 individual bacterial cell trajectories

141

142 To visualize the swimming behavior of individual bacterial cells using light sheet  
143 microscopy, we constructed chambers loaded with fluorescently labelled cells and  
144 imaged their swimming behavior over a defined time course. The chamber was made of  
145 1% Luria-bertani (LB) agarose to support biofilm formation. PAO1,  $\Delta dipA$  or  $\Delta fimX$  were  
146 first incubated in the chamber with ABTGC minimal medium for 6 hours to allow initial  
147 attachment. The agarose chamber was then mounted in the Zeiss Z1 light sheet  
148 microscope for imaging. (Fig. 1A). By moving the sample into the z-direction, the  
149 trajectories of bacterial cells in 3D can be obtained. During light sheet image acquisition

150 in the z-direction continuously, the x-y coordinates of the bacterial cells in each z-step  
151 can be captured while the exposure time (i.e 80 ms) of each z-step are recorded as time  
152 intervals (Fig. 1B). If the bacteria turn and swim in the reverse direction during image  
153 acquisition, the trajectory will be cut off with shorter time durations (Fig. 1C). However,  
154 owing to rotational diffusion, the bacterial cell will typically not execute a sharp turn but  
155 will instead exhibit a “curved” trajectory during reversal. Part of this curved trajectory  
156 that is moving forwards can still be captured and hence we can still capture and record  
157 a reversal taking place. The x-y coordinates of bacterial cells in each z-step image are  
158 linked and the acquisition time of each z-step is taken into account to reconstruct the  
159 trajectories (Fig.1D). When all information is combined, a space-time projection can be  
160 created, and we are able to determine the bacterial trajectories in 3D over a period of  
161 time. The space-time projection and the 3D trajectories of individual bacterial cells in a  
162 large field of view can easily be visualized by a simple 3D reconstruction algorithm (Fig.  
163 1E). We are able to track individual bacterial cells for a duration of 15 s. In general, we  
164 can track hundreds of cells simultaneously to obtain reliable statistics for swimming  
165 speeds and turns.

166  
167 We incubated PAO1,  $\Delta dipA$  and  $\Delta fimX$  mutants in the ABTGC medium within the  
168 chamber described in Figure 1A, and light sheet imaging was carried out after 6 hours  
169 of incubation. We found that, in the bulk medium and away from walls, PAO1,  $\Delta dipA$  and  
170  $\Delta fimX$  swam with an average speed of  $23.9 \pm 6.0 \mu\text{m/s}$ ,  $23.6 \pm 3.9 \mu\text{m/s}$  and  $24.2 \pm 5.0$   
171  $\mu\text{m/s}$ , respectively (Fig 2A & B & Table 2). These values are consistent with previously  
172 reported values (2). The average speeds were obtained by averaging the speeds of  
173 individual cells over their whole tracked trajectories. To further validate our imaging and  
174 tracking method, we repeated the experiments with *E. coli*, we found that *E. coli* cells  
175 swam with an average speed of  $15.5 \pm 3.9 \mu\text{m/s}$  (Fig. 2B, S1A & Table 2), also consistent  
176 with previously reported values (20).

177  
178 In addition, we can also track when individual bacterial cells change their swimming  
179 directions and “turn”. For every segment of a cell’s trajectory, we can define a turning  
180 angle,  $\theta$ , as the angle between stitched line segments between two adjacent frames,  
181 i.e., it is the angle between two straight lines: the first drawn through the two-point  
182 locations of the particle in frames  $i$  and  $i+1$ , and the second drawn through the two-point  
183 locations of the particle in frames  $i+1$  and  $i+2$  (Fig. 2C). Unlike the more commonly  
184 studied “run-and-tumble” mechanism of *E. coli*, where counter-clockwise (CCW) rotation  
185 of the flagella leads to forward motion and clockwise (CW) rotation leads to tumble and  
186 hence change of direction, *P. aeruginosa* makes use of a different mechanism to swim  
187 [21], where CCW rotation leads to forward motion and CW rotation leads to backward  
188 motion. During these reversals from CCW to CW or vice versa, the flagellum typically is  
189 not rotating, in a phase which we term “pause.” During these pauses, rotational

190 diffusion leads to the cell adopting a new direction. We term this mechanism “run-  
191 reverse-pause”.

192

193 For PAO1, we found that a typical trajectory comprised a series of straight tracks  
194 interspersed with sharp turns. These sharp turns suggest that monotrichous PAO1  
195 indeed swim in a “run-reverse-turn” mechanism, where a run corresponds to the single  
196 helical flagellum rotating counter-clockwise and reverse to the flagellum rotating  
197 clockwise, with the sharp turns corresponding to changes in the direction of flagellum  
198 rotation (21). These results are shown in Fig. 2D, which shows a peaked distribution in  
199 the turning angles of PAO1 for  $0 \leq \theta \leq 50$  degrees. In contrast, the distribution of turning  
200 angles for  $\Delta dipA$  shows a peak at larger angles ( $\theta \geq 100$  degrees), corresponding to  
201 curved trajectories with no sharp turns. Thus,  $\Delta dipA$  mutants exhibit reduced turnings,  
202 i.e., reduced flagellar reversals. This is consistent with previous findings for *dipA* [34].  
203 Furthermore,  $\Delta fimX$  exhibited a similar turning angles to PAO1 for  $0 \leq \theta \leq 50$  degrees.  
204 For *E. coli*, a broad distribution with no peaks is observed, where individual *E. coli* cells  
205 exhibit “tumbles” that are distributed over a wide range of angles, consistent with the  
206 “run-and-tumble” mode of *E. coli* swimming (Fig S1B).

207

#### 208 Near wall behavior of bacterial cell swimming

209

210 The presence of a wall can significantly modify the swimming behavior of a bacterial cell  
211 that is moving near it. Although there are many theoretical studies on the interactions  
212 between cells and boundaries (22), there are relatively fewer reports of experiments  
213 which quantitatively study cell swimming behavior near a wall. One plausible reason  
214 could be the difficulty associated with imaging and tracking only those cells that are  
215 close to the wall, which will require a three-dimensional setup. There have been several  
216 studies on three-dimensional tracking of individual bacterial cells (20, 23). However,  
217 these studies were not able to track the behavior of individual cells near wall with  
218 reasonable resolution.

219

220 Here, we focus on tracking individual cells that are swimming close to a wall. We  
221 measure quantitatively the changes in the swimming speed, trajectories, and swimming  
222 orientation that occur for bacterial cells swimming close to a wall.

223

#### 224 PAO1 and $\Delta fimX$ changes its swimming speed near a wall but not $\Delta dipA$

225

226 The change in swimming speed near a wall has been addressed theoretically (24-26)  
227 and we shall not repeat the theoretical calculations here. Briefly, we expect the  
228 swimming speed to increase as the cell swims closer to the wall. Heuristically, this can  
229 be explained as follows. Near to a wall, the viscous drag experienced by a swimming

230 bacterial cell increase. However, for a rod-like bacterial cell propelled by a rotating  
231 flagellum, the component of the drag coefficient in the direction perpendicular to the  
232 long axis of the rod increases faster than the parallel direction. Hence, the swimming  
233 speed which varies with the ratio of the perpendicular drag coefficient to parallel drag  
234 coefficient, increases. We plot the speeds of individual cells ( $\mu\text{m/s}$ ) as a function of how  
235 far they are from a wall ( $h$ ). If we fit how the speed  $v$  varies with the perpendicular  
236 distance to the wall  $h$  with the form  $v \sim h^{-\beta}$ , we obtain the relation  $\beta = 0.13$  for PAO1,  
237 0.056 for  $\Delta dipA$  and 0.26 for  $\Delta fimX$ . (Fig 3A). This shows that the speed of  $\Delta dipA$  does  
238 not increase as it swims near to the wall. Thus, PAO1 and  $\Delta fimX$  cells indeed swim  
239 faster (average speed of  $39.3 \pm 6.2 \mu\text{m/s}$  and  $36.4 \pm 5.2 \mu\text{m/s}$ ) when they are closer to  
240 the wall ( $h < 5 \mu\text{m}$ ). However, for  $\Delta dipA$ , this trend is not present; the mutant cells do not  
241 exhibit higher swimming speed ( $28.1 \pm 6.2 \mu\text{m/s}$ ) when they are closer to the wall (Fig  
242 3B and Table 2). We wish to reiterate that the swimming speed of PAO1,  $\Delta dipA$  and  
243  $\Delta fimX$  far from the wall are similar (Fig. 2A & B and Table 2). Our finding suggests that  
244 the  $\Delta dipA$  mutation affects the swimming speed only when the cells are near a wall,  
245 necessitating a technique to image and track them near a wall such as we are  
246 describing here. Similarly, *E. coli* exhibit a higher speed when they are approaching the  
247 wall (Fig S1A & 3B, Table 2)

248

249 *PAO1 and  $\Delta fimX$  cells change their trajectories, but not  $\Delta dipA$  cells, when they are near*  
250 *a wall*

251

252 For bacteria with helical flagella such as *E. coli*, they are known to change their  
253 trajectories from straight to circular when swimming near a wall (27, 28). When the  
254 helical flagella rotate, they generate a force that is perpendicular to the direction of  
255 motion and parallel to the wall. There is an equal and opposite force acting on the cell  
256 body, which causes it to rotate in the opposite direction as the flagella. Thus, there is a  
257 net torque which results in the cell rotating (dashed black arrow in Fig. 3C). The flagella  
258 of *P. aeruginosa* cells rotate in both counter-clockwise (for “running”) and clockwise (for  
259 “reversing”) resulting in the cells turning both to the right and left. Trajectories of PAO1,  
260  $\Delta dipA$  and  $\Delta fimX$  cells away from a wall and near a wall are shown in Fig. 3D.

261 Interestingly, the radius of curvature of the trajectories of  $\Delta dipA$  mutants are larger, i.e.,  
262 their trajectories appear “more straight” than those of PAO1. This could be due to the  
263 slower swimming speed and rotation rate of the mutant cells (22). Furthermore, we also  
264 see right-handed turns only for *E. coli* when they moved closer to the wall (Fig. S1D).  
265 Since the flagella of *E. coli* cells rotate in the counter-clockwise direction for propulsion,  
266 the cells constantly turn only to the right.

267

268 *PAO1 and  $\Delta fimX$  cells change their orientation, but not  $\Delta dipA$  cells, when they are near*  
269 *a wall*

270

271 As a cell moves towards a wall, it will be reoriented to become parallel to the surface of  
272 the wall (11). Referring to the sketch in Fig. 4A, if a cell is moving towards a wall at an  
273 orientation  $\varphi$  (dashed red arrow), then there will be a gradient in the flow field that will  
274 cause the cell to rotate until  $\varphi = 0$  (dashed blue arrow). The cell trajectory angle of  
275 approach towards the wall,  $\varphi$ , is obtained for each individual cell trajectory by finding the  
276 angle between two lines: the first line is drawn through the location of the particle in the  
277 first frame and the point on the wall closest to it, while the second line is drawn through  
278 the location of the particle in the first and last frame. As such,  $\varphi = 0$  and  $\varphi = 90^\circ$  denote  
279 cells with trajectory paths running perpendicular and parallel to the wall, respectively. In  
280 Fig. 4B, we plot the distribution of orientation  $\varphi$  as a function of distance  $h$  from the wall.  
281 For both PAO1 and  $\Delta fimX$ , we see that the orientation  $\varphi$  approaches 90 degrees as  $h$   
282 decreases, consistent with the expectation that the cells reorient themselves to be  
283 parallel to the wall (Fig 4B). Similarly, *E. coli* exhibit the same behaviour to reorient  
284 themselves to be parallel to the wall (Fig. S1E). However,  $\Delta dipA$  cells do not reorient  
285 themselves (Fig 4B). Taken together, our observations suggest that  $\Delta dipA$  cells do not  
286 increase their speed nor reorient to become parallel to the wall as they approach a wall.

287

288  *$\Delta dipA$  cells forms larger biofilm because of the intrinsic near wall swimming behavior*  
289 *whereas  $\Delta fimX$  cells forms smaller biofilm because of high dispersal frequency.*

290

291 It is important to understand how near wall behaviour could correlate to the capture and  
292 dispersal events during initial attachment stages of biofilm formation. We first analysed  
293 the light sheet images by measuring the population fraction of cells that are captured  
294 versus those that are dispersed, for both PAO1,  $\Delta dipA$  and  $\Delta fimX$  (Fig. 4C). We  
295 consider a cell to be captured when the average of its near-wall velocity vector is  
296 pointing towards the wall, and dispersed when it is pointing away from the wall. We  
297 found that 52% population of PAO1, 56% population of  $\Delta dipA$  and 39% population of  
298  $\Delta fimX$  were captured, respectively; and 48% population of PAO1, 44% population of  
299  $\Delta dipA$  and 61% population of  $\Delta fimX$  were undergoing dispersal, respectively (p-value  
300  $< 0.05$ ) (Fig 4D). In addition, we measured the biofilm volume (biomass) on a wall  
301 surface with area of 23,267  $\mu\text{m}^2$  using 3D rendering images (Imaris) to show the  
302 correlation between near wall behavior and biofilm size. We found that  $\Delta dipA$  formed a  
303 largest volume of biofilm whereas  $\Delta fimX$  formed a smaller biofilm after 6 hours of  
304 incubation (Fig. 4E). These are consistent with other reports, which suggest that  $\Delta fimX$   
305 is deficient in biofilm formation while  $\Delta dipA$  demonstrated an enhanced initial  
306 attachment and lower dispersal during biofilm formation (3, 6).

307 **Discussion**

308



309 The study of the spatial dynamics of bacteria is crucial to formulate solutions against  
310 microbial infections and biofouling. It is challenging to develop an imaging system,  
311 which is fast enough to observe the spatiotemporal activities of free-swimming bacteria  
312 with sufficient resolution. We have developed a new technique based on light sheet  
313 microscopy to observe single bacterium swimming behavior with better precision and  
314 resolution compared to other pseudo-3D imaging methods such as holographic particle  
315 tracking. Consequently, we are able to accurately measure bacterial swimming velocity  
316 and trajectories that are consistent with existing theoretical predictions and experimental  
317 data. It is known that bacterial swimming behavior is largely influenced by the presence  
318 of solid surfaces and the swimming behavior near a wall is significantly different  
319 compared to 'away from wall' regions (29).

320

321 Pathogenic microorganisms colonize and form biofilms on various solid surfaces,  
322 causing severe environmental damage and pollution(18). In our light sheet microscopy  
323 imaging setup, we built a chamber that allows concurrent and clear imaging of bacteria  
324 movement near a vertical wall and in regions away from the wall (Fig. 1A). Our method  
325 is suitable for studying the behaviour of bacteria motility on walls and tilted surfaces,  
326 which contributes to understanding and then tackling the problem of biofouling of ships  
327 hulls and pipelines.

328

329 Using the technique described in this paper, we investigated the swimming behavior of  
330 *P. aeruginosa* and its mutants that exhibit varied swimming patterns and ability of  
331 biofilm formation. We then imaged and quantified the statistics of trajectories, speed,  
332 and orientation, which can provide valuable insights into bacterial behavior in both 'near  
333 wall' and 'away from wall' environments. This technique is suitable for characterizing  
334 flagella-dependent motility by comparing wild type species to mutants with defective  
335 flagella movement of other bacterial species to understand mechanistically the function  
336 of various bacterial genes implicated in biofilm formation.

337

338 Future applications of light sheet microscopy to visualize bacterial swimming dynamics  
339 are vast, especially to naturally occurring bacterial communities. One useful application  
340 is to image the initial phases of bacterial biofilm formation in 4D, the fourth dimension  
341 being time. To date, it remains challenging to observe the early stages of biofilm  
342 formation in 4D due to obstacles in imaging techniques. The speed of bacterial  
343 displacement and attachment to early biofilm layers are technically difficult to capture  
344 without using our approach. Furthermore, the use of different fluorescence labels makes  
345 it possible to image more than one population or species of bacteria concurrently, within  
346 the same field of view. One could couple spatiotemporal analyses of bacterial swimming  
347 with the chemotactic response to varying chemo-effectors to understand the influence of  
348 nutrients in early biofilm formation. The first step to treating biofouling is to understand

349 early-stage bacterial dynamics through direct imaging of bacteria-surface interactions.  
350 Our method developed and described here is robust and applicable to other living  
351 microbial systems. Therefore, we envisage that this technique will transform modern 3D  
352 microscopy with potentially massive practical capabilities.

353  
354 Our findings suggest that PAO1 increases its speed and change its swimming angle  
355 when it gets closer to a wall. This will result in less capturing and more dispersal events,  
356 which eventually results in smaller biofilm size during initial attachment. The motility  
357 behaviour of the pilus deficient FimX mutant, which is less adept in bacterial  
358 colonization of surfaces and formation of biofilms, formed biofilms indistinguishable from  
359 those of WT PAO1. In contrast,  $\Delta dipA$  mutant moves toward the wall with steady speed  
360 without changing of swimming angle. The near wall behavior of  $\Delta dipA$  allows it to  
361 interact more effectively with the surface or other bacteria leading to more capturing and  
362 less dispersal events. Thus, a larger biofilm can be formed by  $\Delta dipA$  during initial  
363 attachment.

364

## 365 **Materials and Methods**

366

### 367 Bacteria strains and culture

368

369 All bacteria strains used in this study is listed in Table 1 in the supplementary material.  
370 All bacteria were grown in LB broth overnight with agitation at 37°C. Before imaging, the  
371 bacteria were diluted to an optical density of OD<sub>600</sub>=1.5 and stained with Vybrant®  
372 Dyecycle Green™ stain (Invitrogen) for 30 minutes under agitation.

373

374 Table 1

| Strain                      | Characteristic                                                                        | Source/Reference |
|-----------------------------|---------------------------------------------------------------------------------------|------------------|
| <i>E. coli</i> DH5 $\alpha$ | Competent cells used for molecular cloning                                            | Invitrogen       |
| <i>P. Aeruginosa</i> PAO1   | Wild type strain from the Washington Genome Center PAO1 mutant library                | (30)             |
| $\Delta dipA$               | PA5017 transposon mutant PW9424 from the Washington Genome Center PAO1 mutant library | (30)             |

|               |                                                                                                |      |
|---------------|------------------------------------------------------------------------------------------------|------|
| $\Delta fimX$ | PA4959 transposon mutant PW9347 obtained from the Washington Genome Center PAO1 mutant library | (30) |
|---------------|------------------------------------------------------------------------------------------------|------|

375

376 Light sheet microscopy imaging

377

378 The light sheet microscopy imaging used in this study requires a custom-made  
379 apparatus that included a bacteria inoculation chamber and Zeiss light sheet Z.1  
380 microscope (Carl Zeiss). The bacteria inoculation chamber was made of 1.5% LB  
381 agarose. For biofilm formation, the stained bacteria was pelleted down, resuspended in  
382 specially formulated ABT minimal medium supplemented with 2 g of glucose per litre  
383 and 2 g of Casamino Acids per litre (ABTGC) (31) and loaded into the agarose  
384 chamber. After 6 hours of incubation at 37°C, the agarose chamber was mounted onto  
385 the Zeiss light sheet Z.1 microscope. The 3-dimensional imaging boundary was defined  
386 within 200 z-steps along the z-axis with 0.46µm thickness. Each z-step was recorded at  
387 an exposure time of 80 ms using a 40x water immersion objective (N.A 1.0) and a high-  
388 speed camera (Carl Zeiss). The z-step moved to the next z-step immediately after each  
389 acquisition without any delay (Fig 1A). Each experiment was repeated for 60 times in  
390 three independent experiments.

391

392 Data analysis

393

394 The trajectories of individual bacterial cells are obtained from the frame by frame  
395 analysis of the captured images. In a single frame, individual bacterial cells appear as  
396 "particles." Automated particle tracking is then used to stitch together the "particles" to  
397 form trajectories. Algorithms for particle tracking have been extensively reported.  
398 Briefly, the particles are first segmented and identified using the difference of Gaussians  
399 approach (32). They are then filtered based on mean intensity and quality. Next, the  
400 segmented particles are tracked by linking the individual particles from each frame to  
401 the next using the linear assignment problem (LAP) method (33), with modifications to  
402 the linking cost calculations with respect to both mean intensity and quality. An  
403 example of this tracking is shown in Fig. 1D.

404

405 **Acknowledgments**

406

407 This project is supported by Singapore Ministry of Education Academic Research  
408 Funding Tier 1 (RG44-16) and Nanyang Technological University SUG to H.Y.L. and  
409 Tier 1 (RG138/16) to C.G.K.

410

## 411 **References**

412

- 413 1. Chang C-Y. 2017. Surface Sensing for Biofilm Formation in *Pseudomonas*  
414 *aeruginosa*. *Frontiers in Microbiology* 8:2671.
- 415 2. Xu L, Xin L, Zeng Y, Yam JK, Ding Y, Venkataramani P, Cheang QW, Yang X,  
416 Tang X, Zhang LH, Chiam KH, Yang L, Liang ZX. 2016. A cyclic di-GMP-binding  
417 adaptor protein interacts with a chemotaxis methyltransferase to control flagellar  
418 motor switching. *Sci Signal* 9:ra102.
- 419 3. Roy AB, Petrova OE, Sauer K. 2012. The Phosphodiesterase DipA (PA5017) Is  
420 Essential for *Pseudomonas aeruginosa* Biofilm Dispersion. *Journal of*  
421 *Bacteriology* 194:2904-2915.
- 422 4. O'Toole GA, Kolter R. 1998. Flagellar and twitching motility are necessary for  
423 *Pseudomonas aeruginosa* biofilm development. *Mol Microbiol* 30:295-304.
- 424 5. Piepenbrink KH, Sundberg EJ. 2016. Motility and adhesion through type IV pili in  
425 Gram-positive bacteria. *Biochem Soc Trans* 44:1659-1666.
- 426 6. Jain R, Sliusarenko O, Kazmierczak BI. 2017. Interaction of the cyclic-di-GMP  
427 binding protein FimX and the Type 4 pilus assembly ATPase promotes pilus  
428 assembly. *PLoS Pathog* 13:e1006594.
- 429 7. Mitchell JG, Kogure K. 2006. Bacterial motility: links to the environment and a  
430 driving force for microbial physics. *Fems Microbiology Ecology* 55:3-16.
- 431 8. Persat A, Nadell CD, Kim MK, Ingremeau F, Siryaporn A, Drescher K, Wingreen  
432 NS, Bassler BL, Gitai Z, Stone HA. 2015. The Mechanical World of Bacteria. *Cell*  
433 161:988-997.
- 434 9. Son K, Brumley DR, Stocker R. 2015. Live from under the lens: exploring  
435 microbial motility with dynamic imaging and microfluidics. *Nature Reviews*  
436 *Microbiology* 13:761-775.
- 437 10. Vaituzis Z, Doetsch RN. 1969. Motility Tracks - Technique for Quantitative Study  
438 of Bacterial Movement. *Applied Microbiology* 17:584-&.
- 439 11. Berke AP, Turner L, Berg HC, Lauga E. 2008. Hydrodynamic attraction of  
440 swimming microorganisms by surfaces. *Physical Review Letters* 101.
- 441 12. Morales-Soto N, Anyan ME, Mattingly AE, Madukoma CS, Harvey CW, Alber M,  
442 Deziel E, Kearns DB, Shrout JD. 2015. Preparation, Imaging, and Quantification  
443 of Bacterial Surface Motility Assays. *Jove-Journal of Visualized Experiments*  
444 doi:ARTN e52338  
445 10.3791/52338.
- 446 13. Berg HC, Brown DA. 1974. Chemotaxis in *Escherichia coli* analyzed by three-  
447 dimensional tracking. *Antibiot Chemother (1971)* 19:55-78.
- 448 14. Wu MM, Roberts JW, Kim S, Koch DL, DeLisa MP. 2006. Collective bacterial  
449 dynamics revealed using a three-dimensional population-scale defocused  
450 particle tracking technique. *Applied and Environmental Microbiology* 72:4987-  
451 4994.
- 452 15. Bown MR, MacInnes JM, Allen RWK, Zimmerman WBJ. 2006. Three-  
453 dimensional, three-component velocity measurements using stereoscopic micro-  
454 PIV and PTV. *Measurement Science and Technology* 17:2175-2185.

- 455 16. Molaei M, Sheng J. 2014. Imaging bacterial 3D motion using digital in-line  
456 holographic microscopy and correlation-based de-noising algorithm. *Optics*  
457 *Express* 22:32119-32137.
- 458 17. Sheng J, Malkiel E, Katz J. 2006. Digital holographic microscope for measuring  
459 three-dimensional particle distributions and motions. *Applied Optics* 45:3893-  
460 3901.
- 461 18. Dzianach PA, Dykes GA, Strachan NJC, Forbes KJ, Perez-Reche FJ. 2019.  
462 Challenges of biofilm control and utilization: lessons from mathematical  
463 modelling. *J R Soc Interface* 16:20190042.
- 464 19. Franklin MJ, Chang C, Akiyama T, Bothner B. 2015. New Technologies for  
465 Studying Biofilms. *Microbiol Spectr* 3.
- 466 20. Cheong FC, Wong CC, Gao YF, Nai MH, Cui YD, Park S, Kenney LJ, Lim CT.  
467 2015. Rapid, High-Throughput Tracking of Bacterial Motility in 3D via Phase-  
468 Contrast Holographic Video Microscopy. *Biophysical Journal* 108:1248-1256.
- 469 21. Qian C, Wong CC, Swarup S, Chiam KH. 2013. Bacterial tethering analysis  
470 reveals a "run-reverse-turn" mechanism for *Pseudomonas* species motility. *Appl*  
471 *Environ Microbiol* 79:4734-43.
- 472 22. Lauga EP, T. R. 2009. The hydrodynamics of swimming microorganisms.  
473 *Reports on Progress in Physics* 72.
- 474 23. Taute KM, Gude S, Tans SJ, Shimizu TS. 2015. High-throughput 3D tracking of  
475 bacteria on a standard phase contrast microscope. *Nature Communications* 6.
- 476 24. H BCaW. 1977. Fluid mechanics of propulsion by cilia and flagella *Annu Rev*  
477 *Fluid Mech* 9:339-98
- 478 25. F KD. 1974. Propulsion of microorganisms near solid boundaries. *J Fluid Mech*  
479 64:33-49.
- 480 26. Katz D F BJRaPSL. 1975. Movement of slender bodies near plane boundaries at  
481 low Reynolds number *J Fluid Mech* 72:529-40.
- 482 27. DiLuzio WR, Turner L, Mayer M, Garstecki P, Weibel DB, Berg HC, Whitesides  
483 GM. 2005. *Escherichia coli* swim on the right-hand side. *Nature* 435:1271-4.
- 484 28. Lauga E, DiLuzio WR, Whitesides GM, Stone HA. 2006. Swimming in circles:  
485 Motion of bacteria near solid boundaries. *Biophysical Journal* 90:400-412.
- 486 29. Lee SJ, Go T, Byeon H. 2016. Three-dimensional swimming motility of  
487 microorganism in the near-wall region. *Experiments in Fluids* 57.
- 488 30. Jacobs MA, Alwood A, Thaipisuttikul I, Spencer D, Haugen E, Ernst S, Will O,  
489 Kaul R, Raymond C, Levy R, Chun-Rong L, Guenther D, Bovee D, Olson MV,  
490 Manoil C. 2003. Comprehensive transposon mutant library of *Pseudomonas*  
491 *aeruginosa*. *Proc Natl Acad Sci U S A* 100:14339-44.
- 492 31. Chua SL, Sivakumar K, Rybtke M, Yuan M, Andersen JB, Nielsen TE, Givskov  
493 M, Tolker-Nielsen T, Cao B, Kjelleberg S, Yang L. 2015. C-di-GMP regulates  
494 *Pseudomonas aeruginosa* stress response to tellurite during both planktonic and  
495 biofilm modes of growth. *Sci Rep* 5:10052.
- 496 32. Lowe DG. 2004. Distinctive Image Features from Scale-Invariant Keypoints.  
497 *International Journal of Computer Vision* 60:91-110.
- 498 33. Jaqaman K, Loerke D, Mettlen M, Kuwata H, Grinstein S, Schmid SL, Danuser  
499 G. 2008. Robust single-particle tracking in live-cell time-lapse sequences. *Nat*  
500 *Methods* 5:695-702.

501

## 502 **Figure legends**

503

504 Figure 1. Illustration of light sheet microscopy system setup and design. (A)  
505 Fluorescence-labeled bacterial cells were loaded into custom made agarose chamber  
506 (1% agarose in ABTGC medium that supports biofilm formation). The illumination beam  
507 path is orthogonal to the detection beam path. A thin sheet of light is formed at the focal  
508 plane of the detection objective. The sample is moved in the z-direction immediately  
509 after each acquisition and 3D image of the sample is reconstructed thereafter. (B)  
510 During light sheet imaging acquisition in the z-direction, the x-y coordinates of bacterial  
511 cells in each z-step can be captured while the exposure time (i.e 80 ms) of each z-step  
512 can be used as time intervals. (C) During light sheet image acquisition, the trajectory will  
513 be cut off with shorter time durations when bacteria turn and swim in a reverse direction.  
514 (D) Tracking of bacterial cells from the frame by frame analysis. Bacterial cells which  
515 appear as “particles” are stitched together to form trajectories using the linear  
516 assignment problem (LAP) method after segmentation utilizing the difference of  
517 Gaussians approach and filtering based on mean intensity and quality. (E) Large field of  
518 view of the 3D trajectories of bacteria swimming in the agarose chamber.

519

520 Figure 2. Swimming behavior of PAO1,  $\Delta dipA$  and  $\Delta fimX$ . (A) Histograms of the speed  
521 of PAO1,  $\Delta dipA$  and  $\Delta fimX$  obtained from 323, 598, and 375 cell trajectories tracked  
522 from 5 different experiments, respectively. (B) Average speeds for PAO1,  $\Delta dipA$ ,  $\Delta fimX$   
523 and *E. coli* are  $23.9 \pm 6.0 \mu\text{m/s}$ ,  $23.6 \pm 3.9 \mu\text{m/s}$ ,  $24.2 \pm 5.0 \mu\text{m/s}$ , and  $15.5 \pm 3.9 \mu\text{m/s}$ ,  
524 respectively. (C) Turning angles for PAO1,  $\Delta dipA$ ,  $\Delta fimX$  and *E. coli*. The turning angle,  
525  $\theta$ , represents the angle between stitched line segments between two adjacent frames. It  
526 is the angle between two straight lines, e.g.,  $\theta_1$  is the angle through two-point locations  
527 of the same tracked particle in frames  $i$  and  $i+1$ . (D) The distribution of turn angles  $\theta$   
528 during a swimming trajectory was quantified and analysed for PAO1 and  $\Delta fimX$  and  
529  $\Delta dipA$ .

530

531 Figure 3. Near wall swimming behavior of PAO1,  $\Delta dipA$  and  $\Delta fimX$ . (A) Cell speed vs.  $h$   
532 which is the perpendicular distance to the wall. The red line is a least-squares fit to the  
533 form  $v \sim h^{-\beta}$  for some exponent  $\beta$ , where  $\beta = 0.13$  for PAO1, 0.056 for  $\Delta dipA$ , 0.26 for  
534  $\Delta fimX$ . (B) The histogram shows the average speeds near the wall ( $h < 5 \mu\text{m}$ ) for  
535 PAO1,  $\Delta dipA$  and  $\Delta fimX$ . (C) Illustration of swimming trajectory of bacteria with helical  
536 flagella near a wall and away from a wall. A force perpendicular to the direction of  
537 motion and parallel to the wall is generated when helical flagella rotate. An equal and  
538 opposite force acts on the cell body and causes it to rotate in the opposite direction as  
539 the flagella (solid black arrows). This creates a net torque which results in the cell  
540 rotating (dashed black arrow). (D) Trajectories for PAO1,  $\Delta dipA$  and  $\Delta fimX$  away from a

541 wall ( $h > 5\mu\text{m}$ ) and near a wall ( $h < 5\mu\text{m}$ ). Circular trajectories are observed near the  
542 wall of PAO1 and  $\Delta\text{fimX}$ , but not away from the wall.  $\Delta\text{dipA}$  shows trajectories with large  
543 radius of curvature (i.e., effectively straight) regardless of whether it is near ( $h < 5\mu\text{m}$ ) or  
544 away from the wall ( $h > 5\mu\text{m}$ ).

545

546 Figure 4.  $\Delta\text{dipA}$  does not reorient to be parallel to the wall surface, which correlates to a  
547 higher capture frequency for better biofilm formation. (A) Swimming bacteria reorient to  
548 be parallel to the surface of the wall. When a cell moves towards a wall at an orientation  
549  $\varphi$  (dashed red arrow), there will be a gradient in the flow field that will cause the cell to  
550 rotate until  $\varphi = 0$  (dashed blue arrow). (B) The cell trajectory angle of approach towards  
551 the wall,  $\varphi$ , is obtained for each individual cell trajectory. The number of PAO1 and  
552  $\Delta\text{fimX}$  with  $\varphi$  ending to 0 increases as the distance to the wall  $h$  decreases. (C)  
553 Schematic of bacterial cell approaching a wall, capture and dispersal. (D)  $\Delta\text{dipA}$  showed  
554 a significant higher percentage of capture event than PAO1 and  $\Delta\text{fimX}$  whereas  $\Delta\text{fimX}$   
555 showed a significant higher percentage of dispersal when compared with PAO1  
556 and  $\Delta\text{dipA}$ . (E) The average volume of biofilm of PAO1,  $\Delta\text{dipA}$  and  $\Delta\text{fimX}$ .

557

558

559 Table 2  
560

|                | Mean speed ( $\mu\text{m/s}$ )        |                                  | P-value (Away from wall vs Near wall) |
|----------------|---------------------------------------|----------------------------------|---------------------------------------|
|                | Away from Wall ( $h > 5\mu\text{m}$ ) | Near Wall ( $h < 5\mu\text{m}$ ) |                                       |
| PAO1           | $23.9 \pm 6.0$                        | $39.3 \pm 6.2$                   | $p < 0.01$                            |
| $\Delta dipA$  | $23.6 \pm 3.9$                        | $28.1 \pm 6.2$                   | $p > 0.05$                            |
| $\Delta fimX$  | $24.2 \pm 5.0$                        | $36.4 \pm 5.2$                   | $p < 0.01$                            |
| <i>E. coli</i> | $15.5 \pm 3.9$                        | $29.2 \pm 4.9$                   | $p < 0.01$                            |

561



**Figure 1**

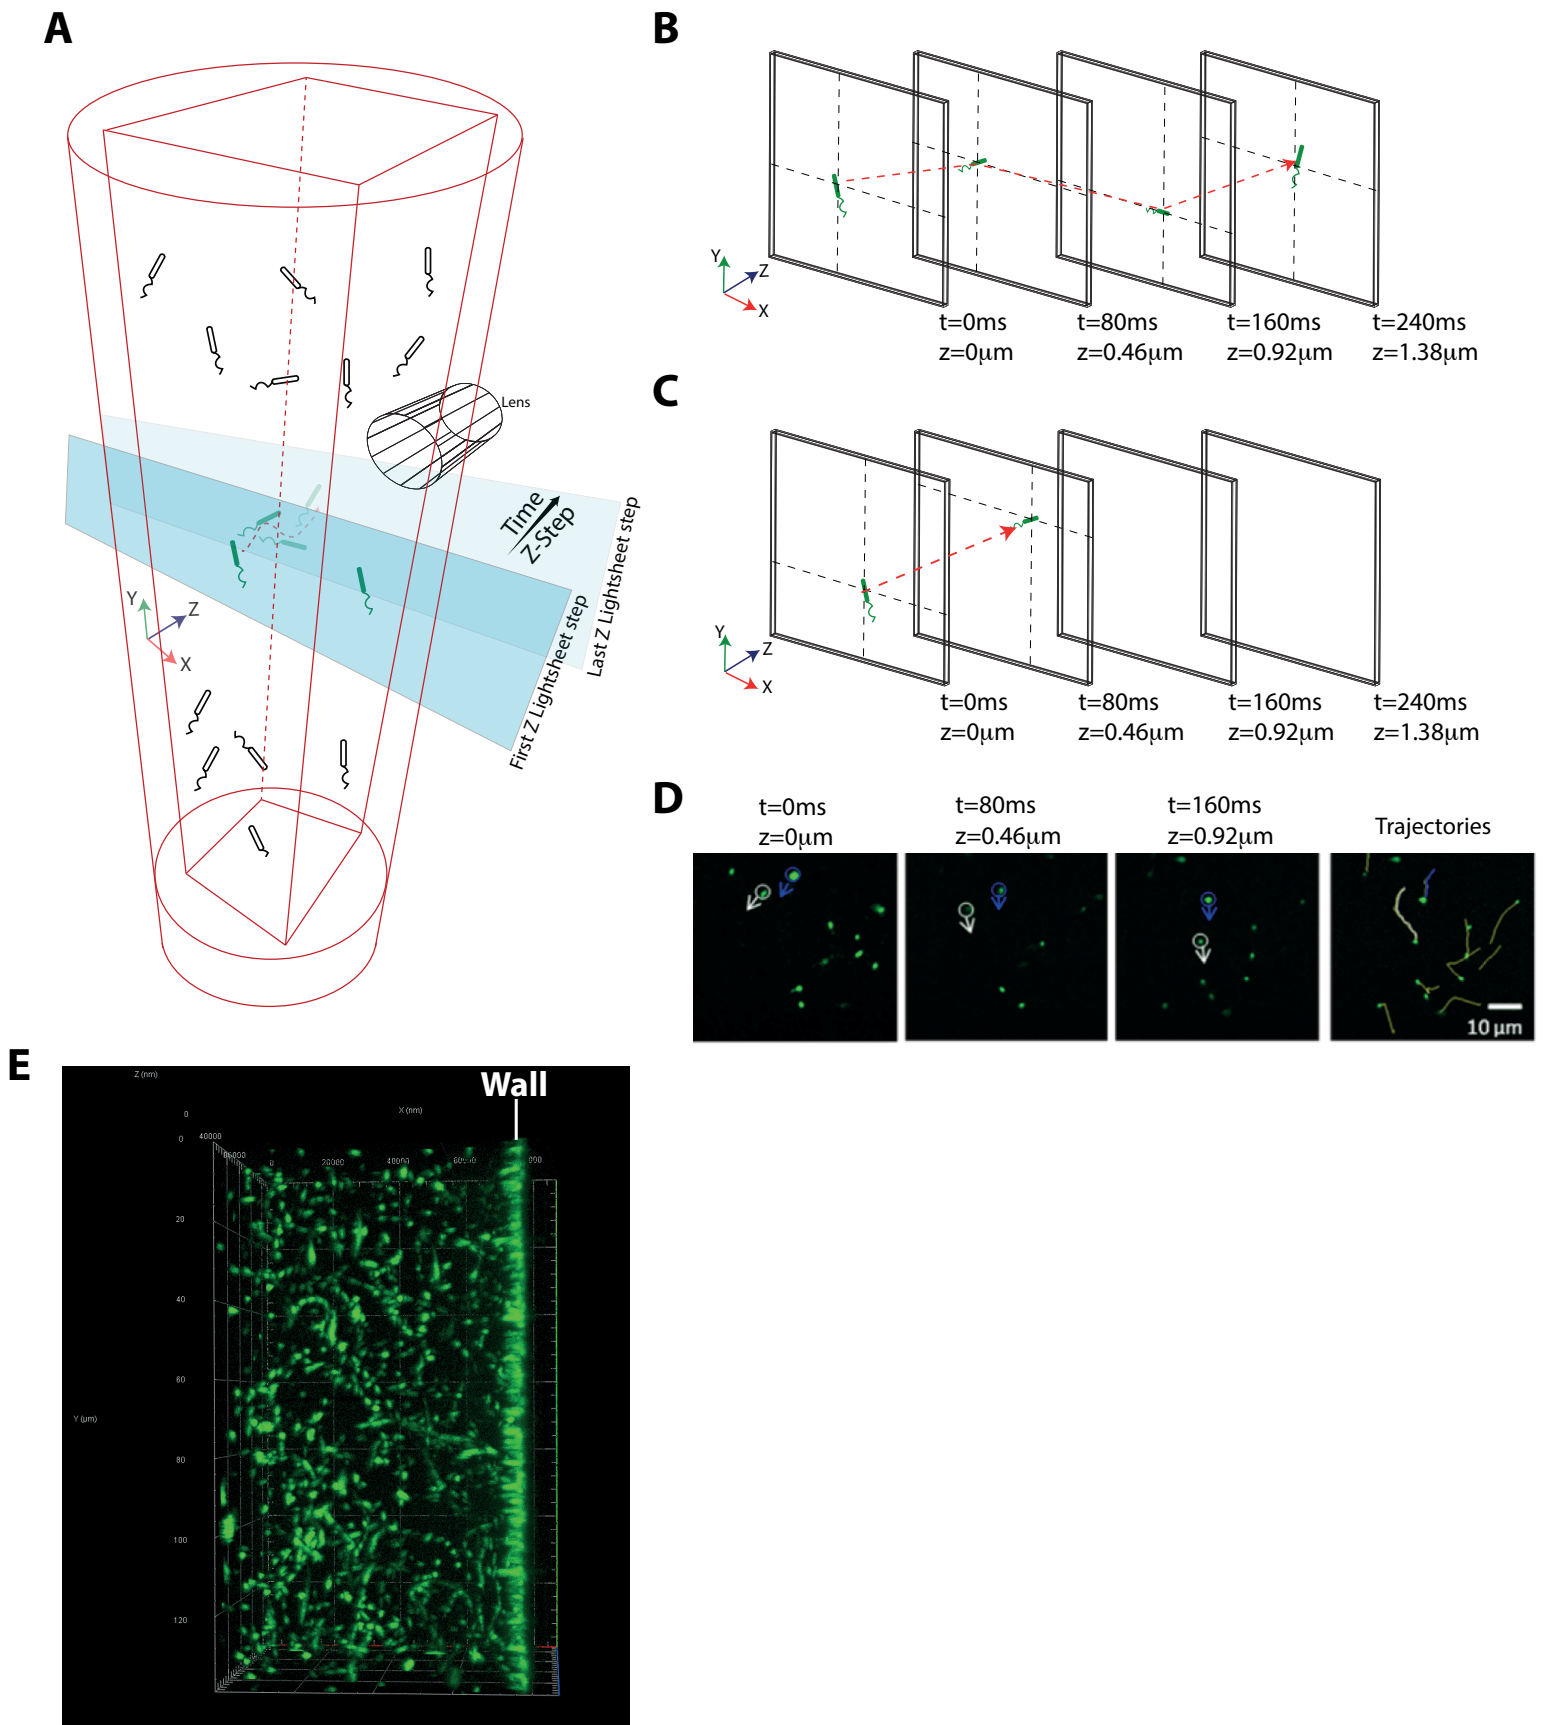

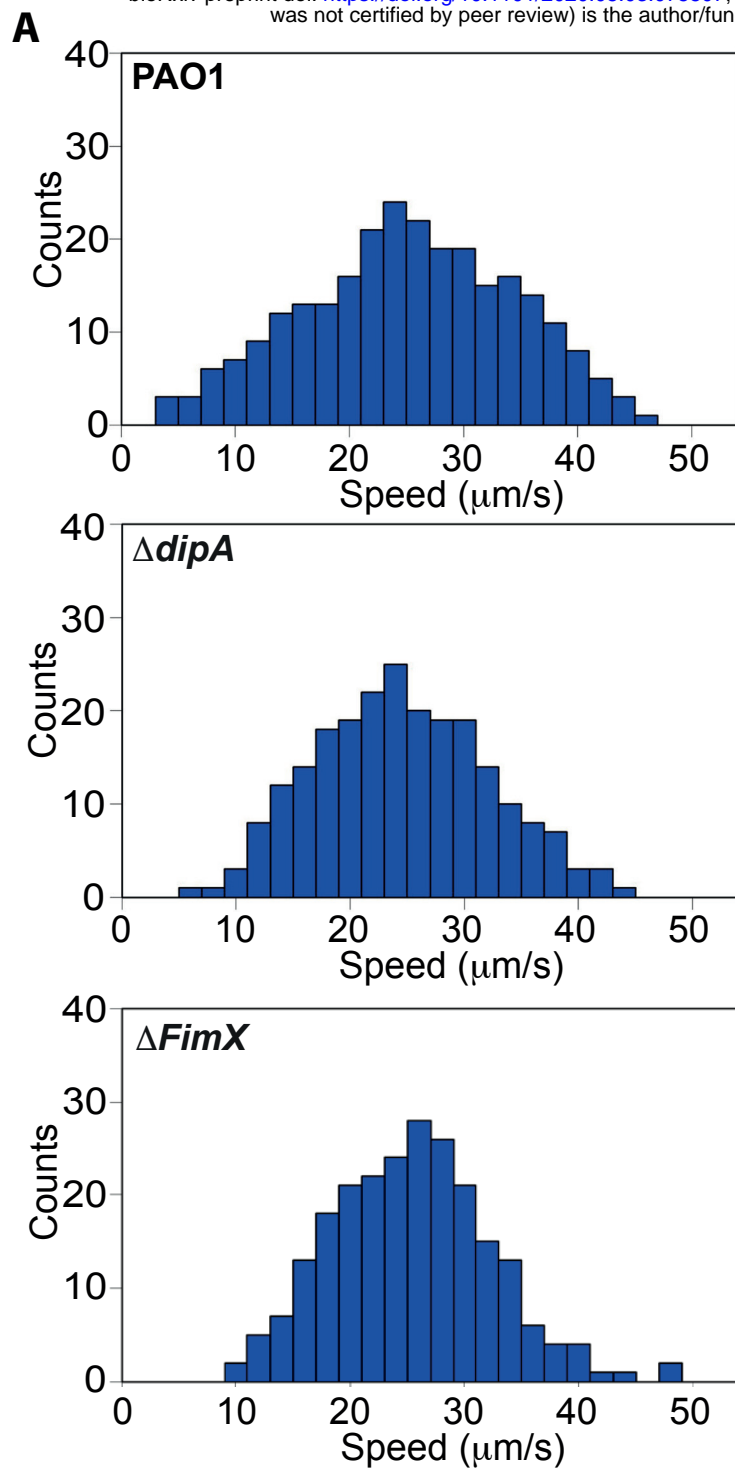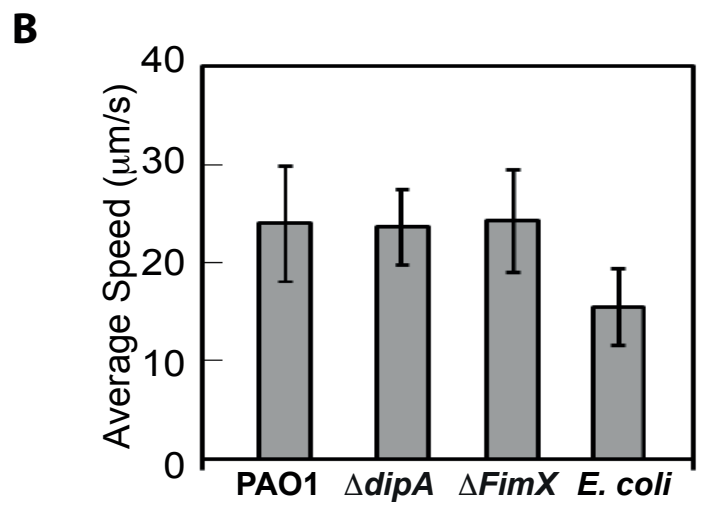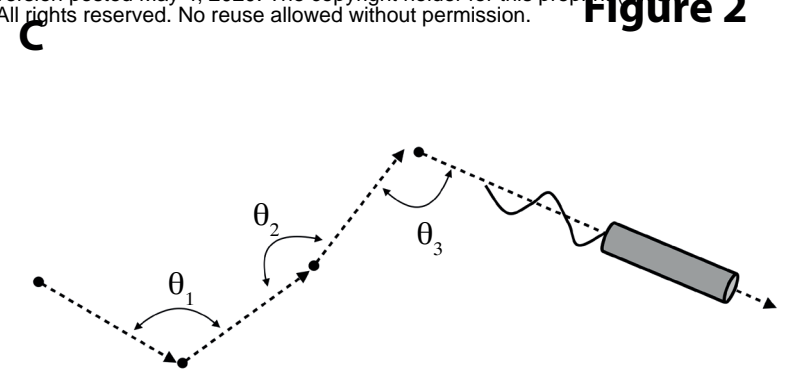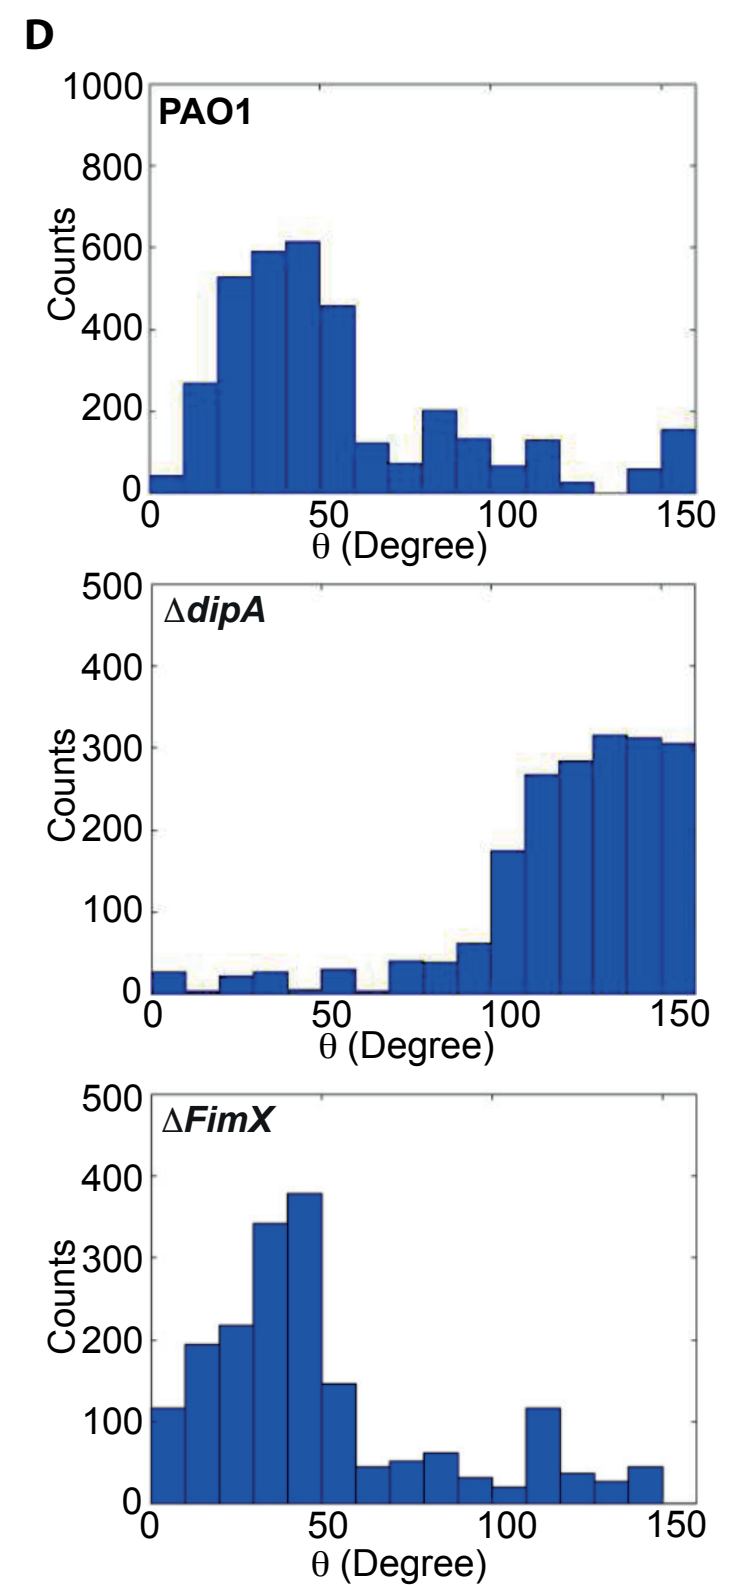

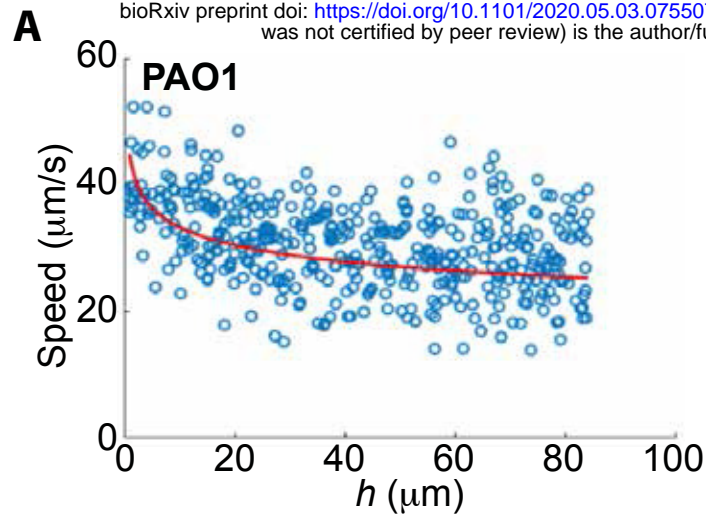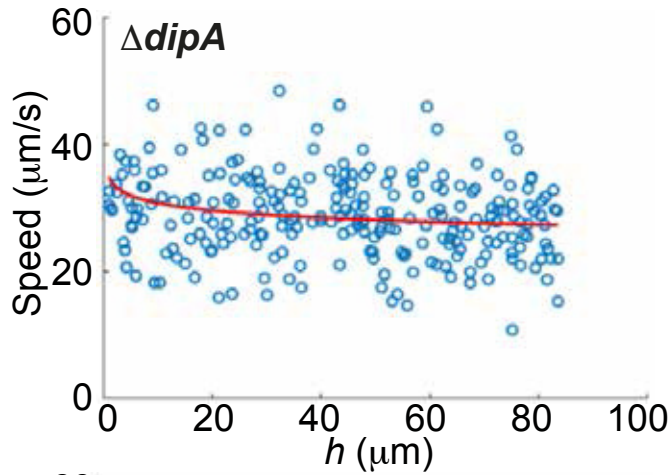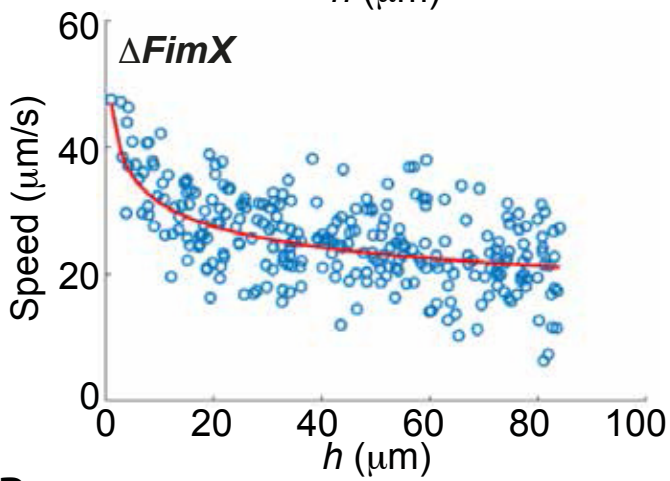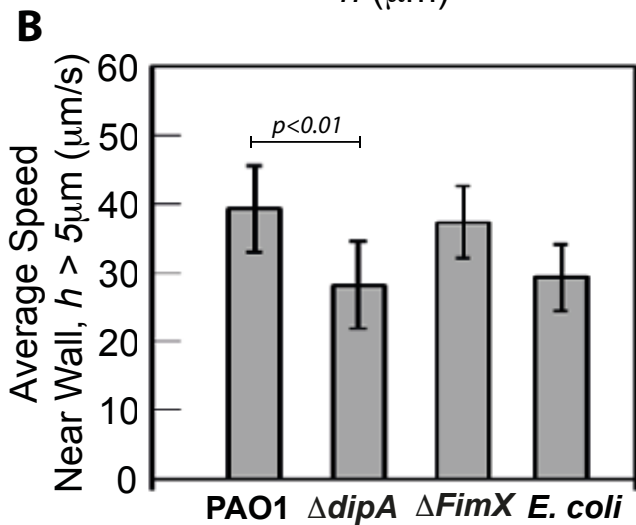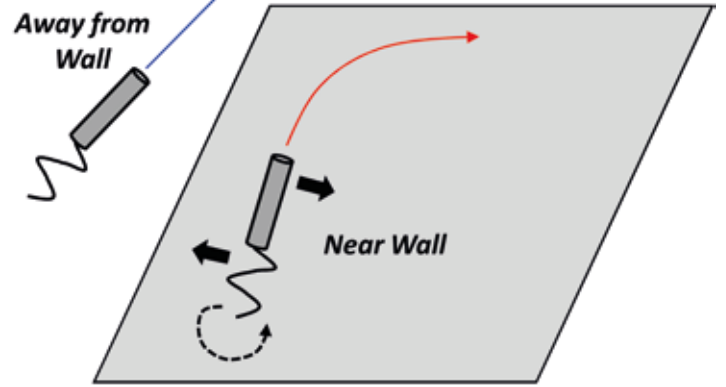

**D**

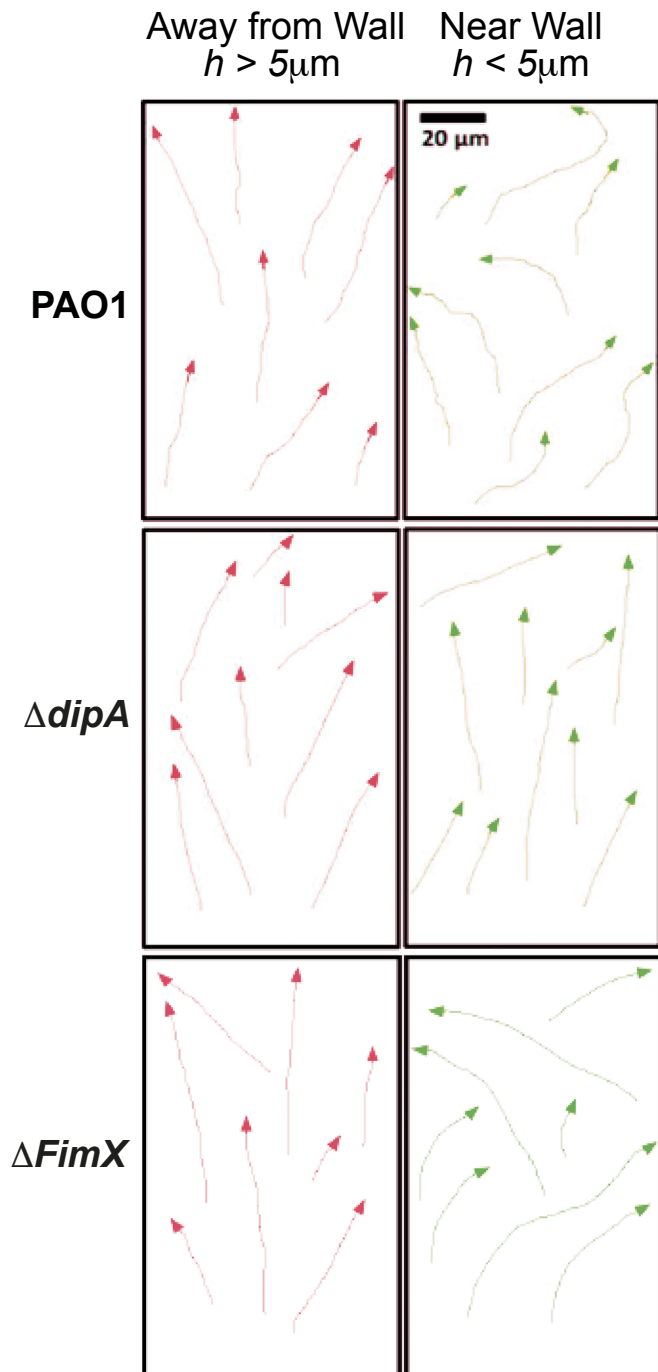

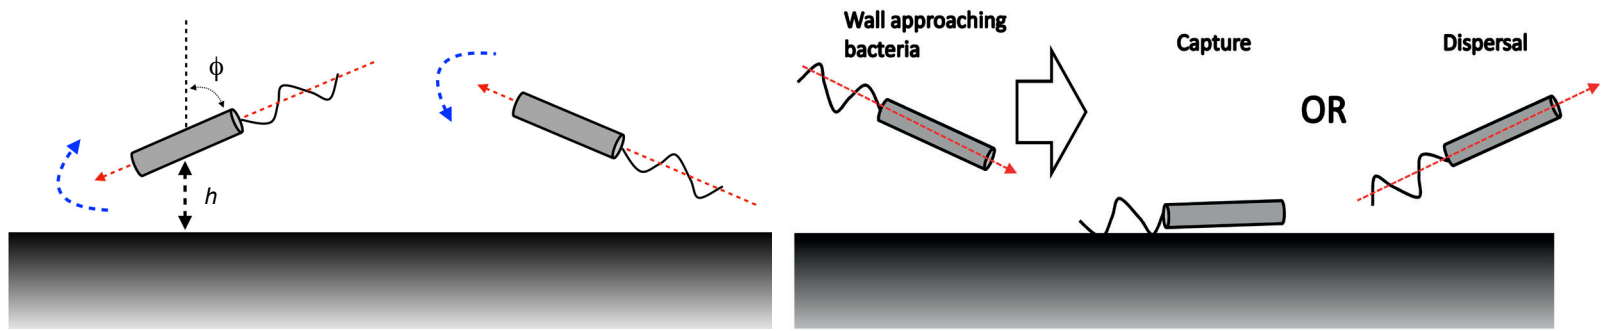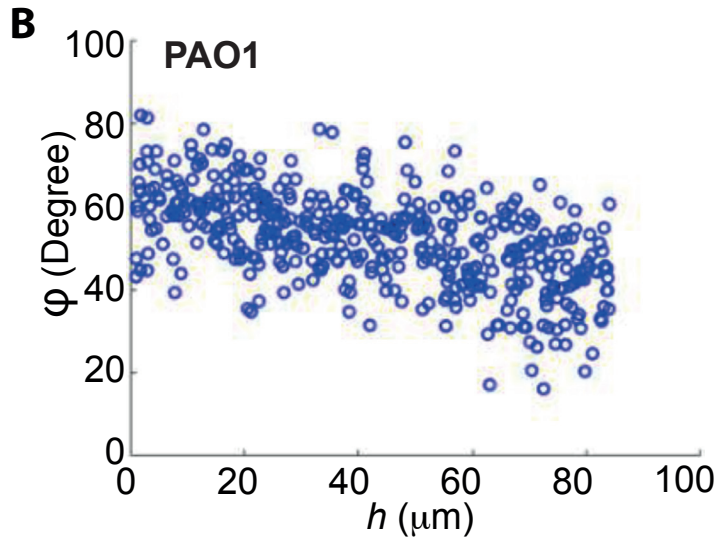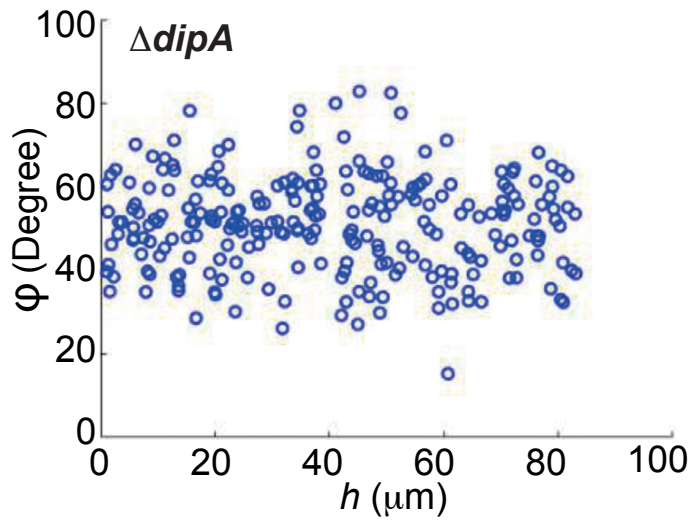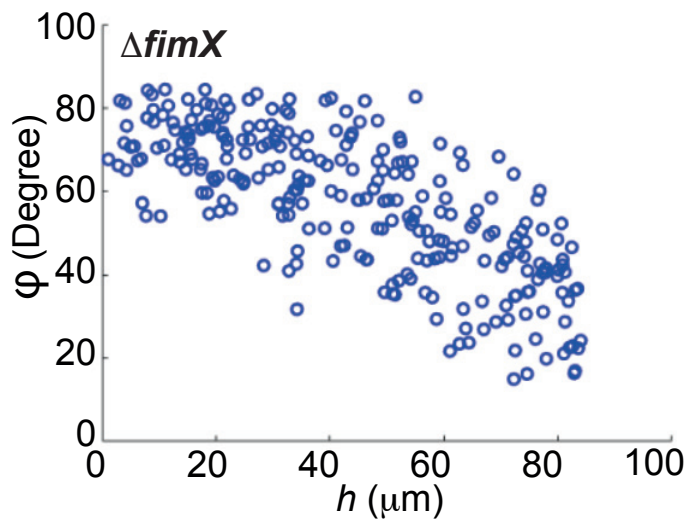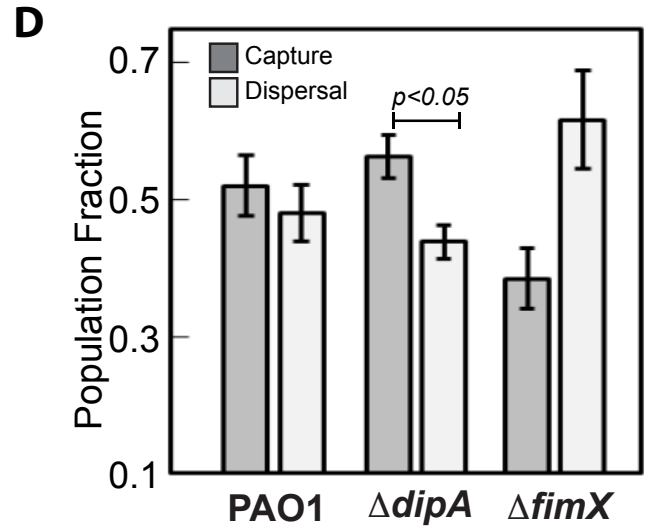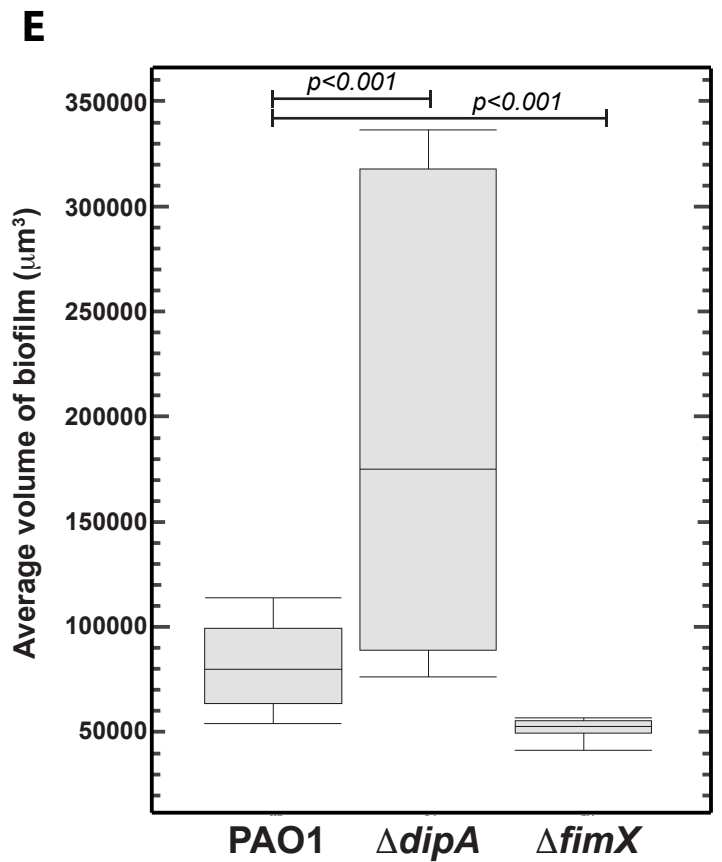

Source: https://www.biorxiv.org/content/biorxiv/early/2020/05/04/2020.05.03.075507.full.pdf
